# Supplementary material for: Low level light therapy/photobiomodulation for diabetic peripheral neuropathy: protocol of a systematic review and meta-analysis
Source: PubMed Central journal article supplement — BMJ Open. 2022 Sep 14;12(9):e059476. doi: 10.1136/bmjopen-2021-059476 (PMC9476114; doi:10.1136/bmjopen-2021-059476), 2022-09-14
Supplement: bmjopen-2021-059476supp001.pdf [file bmjopen-2021-059476supp001.pdf]

**PubMed search strategy**

| No  | Item                                                                                                                                                                                                                                                                                                                                                                                                                                          |
|-----|-----------------------------------------------------------------------------------------------------------------------------------------------------------------------------------------------------------------------------------------------------------------------------------------------------------------------------------------------------------------------------------------------------------------------------------------------|
| #1  | randomized controlled trial [pt]                                                                                                                                                                                                                                                                                                                                                                                                              |
| #2  | controlled clinical trial [pt]                                                                                                                                                                                                                                                                                                                                                                                                                |
| #3  | randomized [tiab]                                                                                                                                                                                                                                                                                                                                                                                                                             |
| #4  | placebo [tiab]                                                                                                                                                                                                                                                                                                                                                                                                                                |
| #5  | clinical trials as topic [mesh: noexp]                                                                                                                                                                                                                                                                                                                                                                                                        |
| #6  | randomly [tiab]                                                                                                                                                                                                                                                                                                                                                                                                                               |
| #7  | trial [ti]                                                                                                                                                                                                                                                                                                                                                                                                                                    |
| #8  | #1 OR #2 OR #3 OR #4 OR #5 OR #6 OR #7                                                                                                                                                                                                                                                                                                                                                                                                        |
| #9  | animals [mh] NOT humans [mh]                                                                                                                                                                                                                                                                                                                                                                                                                  |
| #10 | #8 NOT #9                                                                                                                                                                                                                                                                                                                                                                                                                                     |
| #11 | diabetes mellitus [mh]                                                                                                                                                                                                                                                                                                                                                                                                                        |
| #12 | Diabet* [tiab]                                                                                                                                                                                                                                                                                                                                                                                                                                |
| #13 | #11 OR #12                                                                                                                                                                                                                                                                                                                                                                                                                                    |
| #14 | peripheral nervous system diseases[mh]                                                                                                                                                                                                                                                                                                                                                                                                        |
| #15 | #14 OR (neuropath* OR nervous)[tiab]                                                                                                                                                                                                                                                                                                                                                                                                          |
| #16 | #13 AND #15                                                                                                                                                                                                                                                                                                                                                                                                                                   |
| #17 | Low-level light therapy [mh]                                                                                                                                                                                                                                                                                                                                                                                                                  |
| #18 | (Light Therapies OR Light Therapy OR Low Level Light Therapy OR                                                                                                                                                                                                                                                                                                                                                                               |
| #19 | Low-Level Light Therapies OR Laser Therapy, Low-Level OR Low-Level<br>Laser Therapies OR Laser Irradiation, Low-Power OR Irradiation, Low-Power<br>Laser OR Low-Power Laser Therapy OR Low Power Laser Therapy OR<br>Laser Therapy, Low-Power OR Laser Therapies, Low-Power OR Laser<br>Therapy, Low Power OR Low-Power Laser OR LLLT OR biostimulation OR<br>phototherapy OR photobiomodulation OR infrared OR photon stimulation)<br>[tiab] |
|     | #10 AND #16 AND #17                                                                                                                                                                                                                                                                                                                                                                                                                           |

[pt] denotes a publication type term;

[ti] denotes a word in the title;

[mh] denotes a Medical Subject Heading (MeSH) term ('exploded');

[mesh: noexp] denotes a Medical Subject Heading (MeSH) term ('exploded')

[tiab] denotes a word in the title or abstract.

**Embase search strategy**

- #1 'randomized controlled trial'/exp
- #2 'randomization'/exp
- #3 'double blind procedure'/exp
- #4 'single blind procedure'/exp
- #5 random\*:ab,ti
- #6 #1 OR #2 OR #3 OR #4 OR #5
- #7 'animal'/exp OR 'animal experiment'/exp
- #8 'human'/exp

#9 #7 AND #8  
#10 #7 NOT #9  
#11 #6 NOT #10  
#12 'clinical trial'/exp  
#13 (clin\* NEAR/3 trial\*):ab,ti  
#14 ((singl\* OR doubl\* OR trebl\* OR tripl\*) NEAR/3 (blind\* OR mask\*)):ab,ti  
#15 'placebo'/exp  
#16 placebo\*:ab,ti  
#17 random\*:ab,ti  
#18 'experimental design'/exp  
#19 'crossover procedure'/exp  
#20 'control group'/exp  
#21 'latin square design'/exp  
#22 #12 OR #13 OR #14 OR #15 OR #16 OR #17 OR #18 OR #19 OR #20 OR #21  
#23 #22 NOT #10  
#24 #23 NOT #11  
#25 'comparative study'/exp  
#26 'evaluation'/exp  
#27 'prospective study'/exp  
#28 control\*:ab,ti OR prospectiv\*:ab,ti OR volunteer\*:ab,ti  
#29 #25 OR #26 OR #27 OR #28  
#30 #29 NOT #10  
#31 #30 NOT (#11 OR #23)  
#32 #11 OR #24 OR #31  
#33 'diabetes mellitus'/exp  
#34 Diabet\*:ab,ti  
#35 #33 OR #34  
#36 'peripheral nervous system diseases'/exp  
#37 neuropath\*:ab,ti OR nervous:ab,ti  
#38 #36 OR #37  
#39 #35 AND #38  
#40 'Low-Level Light Therapy'/exp  
#41 (Light Therapies OR Light Therapy OR Low Level Light Therapy OR Low-Level Light Therapies OR Laser Therapy, Low-Level OR Low-Level Laser Therapies OR Laser Irradiation, Low-Power OR Irradiation, Low-Power Laser OR Low-Power Laser Therapy OR Low Power Laser Therapy OR Laser Therapy, Low-Power OR Laser Therapies, Low-Power OR Laser Therapy, Low Power OR Low-Power Laser OR LLLT OR biostimulation OR phototherapy OR photobiomodulation OR infrared OR photon stimulation)\*:ab,ti  
#42 #40 OR #41  
#43 #32 AND #39 AND #42

### **CENTRAL search strategy**

#1MeSH descriptor diabetes mellitus explode all trees

#2(diabet\*)

#3 (#1 or #2)

#4MeSH descriptor Peripheral Nervous System Diseases explode all trees

#5(neuropath\* or nervous)

#6(#4 or #5)

#7(#3 and #6)

#8 MeSH descriptor: [Low-Level Light Therapy] explode all trees

#9 (Light Therapies OR Light Therapy OR Low Level Light Therapy OR Low-Level Light Therapies OR Laser Therapy, Low-Level OR Low-Level Laser Therapies OR Laser Irradiation, Low-Power OR Irradiation, Low-Power Laser OR Low-Power Laser Therapy OR Low Power Laser Therapy OR Laser Therapy, Low-Power OR Laser Therapies, Low-Power OR Laser Therapy, Low Power OR Low-Power Laser OR LLLT OR biostimulation OR phototherapy OR photobiomodulation OR infrared OR photon stimulation)

#10 #8 and #9

#11 #7 and #10

#### **Web of Science search strategy**

#1 TS=(diabetes mellitus) OR TS=(diabet\*)

#2 TS=(neuropath\*) OR TS=(nervous)

#3 #2 AND #1

#4 TS=(Light Therapies OR Light Therapy OR Low Level Light Therapy OR Low-Level Light Therapies OR Laser Therapy, Low-Level OR Low-Level Laser Therapies OR Laser Irradiation, Low-Power OR Irradiation, Low-Power Laser OR Low-Power Laser Therapy OR Low Power Laser Therapy OR Laser Therapy, Low-Power OR Laser Therapies, Low-Power OR Laser Therapy, Low Power OR Low-Power Laser OR LLLT OR biostimulation OR phototherapy OR photobiomodulation OR infrared OR photon stimulation)

#6 #4 AND #3

#### **China National Knowledge Infrastructure (CNKI)**

((TKA='糖尿病') AND (TKA='周围神经病变'+ '神经病变')) OR TKA='DPN') AND (TKA='激光'+ '光疗'+ '光调节'+ '低能量激光'+ '低强度激光'+ '红外'+ '红光'+ '红外线') TKA means title, keyword and abstract

#### **WanFang databases**

主题:(激光 or 光疗 or 光调节 or 低能量激光 or 低强度激光 or 红外 or 红光 or 红外线) and( (主题:(糖尿病) and 主题:(周围神经病变 or 神经病变)) or 主题:(DPN))

#### **Chinese Scientific Journal Database (VIP)**

M=(激光 OR 光疗 OR 光调节 OR 低能量激光 OR 低强度激光 OR 红外 OR 红光 OR 红外线) AND( (M=(糖尿病) AND M=(周围神经病变 OR 神经病变)) OR M=(DPN))

M means title or keyword

### **SinoMed**

("激光"[常用字段:智能] OR "光疗"[常用字段:智能] OR "光调节"[常用字段:智能] OR "低能量激光"[常用字段:智能] OR "低强度激光"[常用字段:智能] OR "红外"[常用字段:智能] OR "红光"[常用字段:智能] OR "红外线"[常用字段:智能]) AND(("糖尿病"[常用字段:智能] AND( "神经病变"[常用字段:智能] OR "周围神经病变"[常用字段:智能])) OR ("DPN"[常用字段:智能]))

### **US National Institutes of Health Ongoing Trials Register (ClinicalTrials.gov)**

(diabetic OR diabetes OR diabete) AND (Neuropathies OR Neuropathy) AND (Light Therapies OR Photobiomodulation OR laser OR LLLT)

### **World Health Organization International Clinical Trials Registry Platform**

(diabetic OR diabetes ) AND (neuropath)AND (Light Therapies OR Photobiomodulation OR OR laser OR LLLT)
